# Supplementary material
Source: PubMed Central journal article supplement (PMC6193835)
Supplement: NIHMS980170-supplement-Supplementary_Materials__figures__tables.pdf [file NIHMS980170-supplement-Supplementary_Materials__figures__tables.pdf]

# Supplementary table 1a. Correlation matrix.

## Correlations

|                                   |                                   |                         | Publication year | RD      | RD_Harm | Study size | Study duration | Placebo response | Active drug response | Quality score | ITT analysis | Parallel design | Outcome 50% or 30% pain reduction | Active placebo | Add-on treatment | Dropout during placebo | Dropout during active |
|-----------------------------------|-----------------------------------|-------------------------|------------------|---------|---------|------------|----------------|------------------|----------------------|---------------|--------------|-----------------|-----------------------------------|----------------|------------------|------------------------|-----------------------|
| Spearman's rho                    | Publication year                  | Correlation Coefficient | 1.000            | -.506** | -.263** | .282**     | .275**         | .195*            | -.371**              | .254**        | .629**       | .302**          | .420**                            | -.137          | .006             | .066                   | -.142                 |
|                                   |                                   | Sig. (2-tailed)         | .                | .000    | .005    | .004       | .002           | .046             | .000                 | .005          | .000         | .001            | .000                              | .129           | .950             | .493                   | .131                  |
|                                   |                                   | N                       | 128              | 105     | 112     | 105        | 128            | 105              | 105                  | 119           | 106          | 128             | 105                               | 105            | 125              | 111                    | 112                   |
| RD                                | RD                                | Correlation Coefficient | -.506**          | 1.000   | .229*   | -.491**    | -.433**        | -.463**          | .568**               | -.341**       | -.384**      | -.301**         | -.259**                           | .017           | -.115            | -.028                  | .174                  |
|                                   |                                   | Sig. (2-tailed)         | .000             | .       | .025    | .000       | .000           | .000             | .000                 | .001          | .000         | .002            | .008                              | .863           | .280             | .789                   | .089                  |
|                                   |                                   | N                       | 105              | 105     | 95      | 105        | 105            | 105              | 105                  | 97            | 93           | 105             | 105                               | 104            | 90               | 95                     | 96                    |
| RD_Harm                           | RD_Harm                           | Correlation Coefficient | -.263**          | .229*   | 1.000   | -.094      | -.079          | .067             | .216*                | -.161         | -.161        | -.008           | .040                              | -.176          | -.160            | .099                   | .781**                |
|                                   |                                   | Sig. (2-tailed)         | .005             | .025    | .       | .367       | .410           | .518             | .036                 | .104          | .123         | .934            | .698                              | .066           | .113             | .298                   | .000                  |
|                                   |                                   | N                       | 112              | 95      | 112     | 95         | 112            | 95               | 95                   | 103           | 93           | 112             | 95                                | 110            | 99               | 112                    | 112                   |
| Study size                        | Study size                        | Correlation Coefficient | .282**           | -.491** | -.094   | 1.000      | .570**         | .372**           | -.262**              | .172          | .583**       | .587**          | .423**                            | .024           | .006             | .062                   | -.065                 |
|                                   |                                   | Sig. (2-tailed)         | .004             | .000    | .367    | .          | .000           | .000             | .007                 | .092          | .000         | .000            | .000                              | .805           | .952             | .550                   | .532                  |
|                                   |                                   | N                       | 105              | 105     | 95      | 105        | 105            | 105              | 105                  | 97            | 93           | 105             | 105                               | 104            | 90               | 95                     | 96                    |
| Study duration                    | Study duration                    | Correlation Coefficient | .275**           | -.433** | -.079   | .570**     | 1.000          | .385**           | -.161                | .271**        | .481**       | .532**          | .347**                            | .057           | .039             | .190*                  | .037                  |
|                                   |                                   | Sig. (2-tailed)         | .002             | .000    | .410    | .000       | .              | .000             | .100                 | .003          | .000         | .000            | .000                              | .531           | .684             | .045                   | .697                  |
|                                   |                                   | N                       | 128              | 105     | 112     | 105        | 128            | 105              | 105                  | 119           | 106          | 128             | 105                               | 125            | 111              | 112                    | 114                   |
| Placebo response                  | Placebo response                  | Correlation Coefficient | .195*            | -.463** | .067    | .372**     | .385**         | 1.000            | .369**               | .231*         | .175         | .311**          | .102                              | .034           | -.034            | -.217*                 | -.085                 |
|                                   |                                   | Sig. (2-tailed)         | .046             | .000    | .518    | .000       | .000           | .                | .000                 | .023          | .093         | .001            | .299                              | .729           | .753             | .034                   | .409                  |
|                                   |                                   | N                       | 105              | 105     | 95      | 105        | 105            | 105              | 105                  | 97            | 93           | 105             | 105                               | 104            | 90               | 95                     | 96                    |
| Active drug response              | Active drug response              | Correlation Coefficient | -.371**          | .568**  | .216*   | -.262**    | -.161          | .369**           | 1.000                | -.206*        | -.262*       | -.121           | -.262**                           | .104           | -.142            | -.281**                | -.007                 |
|                                   |                                   | Sig. (2-tailed)         | .000             | .000    | .036    | .007       | .100           | .000             | .                    | .043          | .011         | .218            | .007                              | .295           | .182             | .006                   | .950                  |
|                                   |                                   | N                       | 105              | 105     | 95      | 105        | 105            | 105              | 105                  | 97            | 93           | 105             | 105                               | 104            | 90               | 95                     | 96                    |
| Quality score                     | Quality score                     | Correlation Coefficient | .254**           | -.341** | -.161   | .172       | .271**         | .231*            | -.206*               | 1.000         | .244*        | .127            | .153                              | .035           | .147             | .108                   | -.009                 |
|                                   |                                   | Sig. (2-tailed)         | .005             | .001    | .104    | .092       | .003           | .023             | .043                 | .             | .013         | .170            | .135                              | .709           | .128             | .279                   | .929                  |
|                                   |                                   | N                       | 119              | 97      | 103     | 97         | 119            | 97               | 97                   | 119           | 103          | 119             | 97                                | 116            | 109              | 103                    | 105                   |
| ITT analysis                      | ITT analysis                      | Correlation Coefficient | .629**           | -.384** | -.161   | .583**     | .481**         | .175             | -.262*               | .244*         | 1.000        | .670**          | .531**                            | -.118          | .140             | .207*                  | -.011                 |
|                                   |                                   | Sig. (2-tailed)         | .000             | .000    | .123    | .000       | .000           | .093             | .011                 | .013          | .            | .000            | .000                              | .234           | .177             | .046                   | .914                  |
|                                   |                                   | N                       | 106              | 93      | 93      | 93         | 106            | 93               | 93                   | 103           | 106          | 106             | 93                                | 104            | 95               | 93                     | 93                    |
| Parallel design                   | Parallel design                   | Correlation Coefficient | .302**           | -.301** | -.008   | .587**     | .532**         | .311**           | -.121                | .127          | .670**       | 1.000           | .537**                            | -.022          | .032             | .062                   | .025                  |
|                                   |                                   | Sig. (2-tailed)         | .001             | .002    | .934    | .000       | .000           | .001             | .218                 | .170          | .000         | .               | .000                              | .807           | .738             | .518                   | .796                  |
|                                   |                                   | N                       | 128              | 105     | 112     | 105        | 128            | 105              | 105                  | 119           | 106          | 128             | 105                               | 125            | 111              | 112                    | 114                   |
| Outcome 50% or 30% pain reduction | Outcome 50% or 30% pain reduction | Correlation Coefficient | .420**           | -.259** | .040    | .423**     | .347**         | .102             | -.262**              | .153          | .531**       | .537**          | 1.000                             | -.135          | -.153            | .061                   | .105                  |
|                                   |                                   | Sig. (2-tailed)         | .000             | .008    | .698    | .000       | .000           | .299             | .007                 | .135          | .000         | .000            | .                                 | .173           | .151             | .557                   | .308                  |
|                                   |                                   | N                       | 105              | 105     | 95      | 105        | 105            | 97               | 93                   | 105           | 93           | 105             | 105                               | 104            | 90               | 95                     | 96                    |
| Active placebo                    | Active placebo                    | Correlation Coefficient | -.137            | .017    | -.176   | .024       | .057           | .034             | .105                 | .035          | -.118        | -.022           | -.135                             | 1.000          | .219*            | -.277**                | -.235*                |
|                                   |                                   | Sig. (2-tailed)         | .129             | .863    | .066    | .805       | .531           | .729             | .295                 | .709          | .234         | .807            | .173                              | .              | .022             | .003                   | .013                  |
|                                   |                                   | N                       | 125              | 104     | 110     | 104        | 125            | 104              | 104                  | 116           | 104          | 125             | 104                               | 125            | 109              | 110                    | 112                   |
| Add-on treatment                  | Add-on treatment                  | Correlation Coefficient | .006             | -.115   | -.160   | .006       | .039           | -.034            | -.142                | .147          | .140         | .032            | -.153                             | .219*          | 1.000            | -.195                  | -.151                 |
|                                   |                                   | Sig. (2-tailed)         | .950             | .280    | .113    | .952       | .684           | .753             | .182                 | .128          | .177         | .738            | .151                              | .022           | .                | .053                   | .136                  |
|                                   |                                   | N                       | 111              | 90      | 99      | 90         | 111            | 90               | 90                   | 109           | 95           | 111             | 90                                | 109            | 111              | 99                     | 99                    |
| Dropout during placebo            | Dropout during placebo            | Correlation Coefficient | .066             | -.028   | .099    | .062       | .190*          | -.217*           | -.281**              | .108          | .207*        | .062            | .061                              | -.277**        | 1.000            | .636**                 | .000                  |
|                                   |                                   | Sig. (2-tailed)         | .493             | .789    | .298    | .550       | .045           | .034             | .006                 | .279          | .046         | .518            | .557                              | .003           | .053             | .                      | .000                  |
|                                   |                                   | N                       | 112              | 95      | 112     | 95         | 112            | 95               | 95                   | 103           | 93           | 112             | 95                                | 110            | 99               | 112                    | 112                   |
| Dropout during active             | Dropout during active             | Correlation Coefficient | -.142            | .174    | .781**  | -.065      | .037           | -.085            | -.007                | -.009         | -.011        | .025            | .105                              | -.235*         | -.151            | .636**                 | 1.000                 |
|                                   |                                   | Sig. (2-tailed)         | .131             | .089    | .000    | .532       | .697           | .409             | .950                 | .929          | .914         | .796            | .308                              | .013           | .136             | .000                   | .                     |
|                                   |                                   | N                       | 114              | 96      | 112     | 96         | 114            | 96               | 96                   | 105           | 93           | 114             | 96                                | 112            | 99               | 112                    | 114                   |

\*\* . Correlation is significant at the 0.01 level (2-tailed).

\* . Correlation is significant at the 0.05 level (2-tailed).

RD=Risk difference = 1/NNT (numbers needed to treat), RC\_Harm = 1/NNH (numbers needed to harm).

Supplementary table 1b. Correlation matrix. Parallel group design studies

Correlations

|                                   |                         |                         | Publication year | RD      | RD_Harm | Study size | Study duration | Placebo response | Active drug response | Quality score | ITT analysis | Outcome 50% or 30% pain reduction | Active placebo | Add-on treatment | Dropout during placebo | Dropout during active |
|-----------------------------------|-------------------------|-------------------------|------------------|---------|---------|------------|----------------|------------------|----------------------|---------------|--------------|-----------------------------------|----------------|------------------|------------------------|-----------------------|
| Spearman's rho                    | Publication year        | Correlation Coefficient | 1.000            | -.366** | -.245*  | -.013      | .206           | .060             | -.252*               | .055          | .327**       | .269*                             | -.050          | .081             | -.135                  | -.275*                |
|                                   |                         | Sig. (2-tailed)         | .                | .002    | .025    | .918       | .058           | .621             | .035                 | .636          | .007         | .024                              | .651           | .497             | .223                   | .011                  |
| N                                 |                         | 85                      | 70               | 83      | 70      | 85         | 70             | 70               | 76                   | 67            | 70           | 84                                | 72             | 83               | 84                     |                       |
| RD                                | Correlation Coefficient | -.366**                 | 1.000            | .237*   | -.287*  | -.355**    | -.474**        | .403**           | -.299*               | -.172         | .038         | -.192                             | -.237          | .092             | .251*                  |                       |
|                                   | Sig. (2-tailed)         | .002                    | .                | .050    | .016    | .003       | .000           | .001             | .018                 | .190          | .756         | .111                              | .073           | .453             | .037                   |                       |
|                                   | N                       | 70                      | 70               | 69      | 70      | 70         | 70             | 70               | 62                   | 60            | 70           | 70                                | 58             | 69               | 69                     |                       |
| RD_Harm                           | Correlation Coefficient | -.245*                  | .237*            | 1.000   | -.100   | -.145      | .077           | .250*            | -.234*               | -.060         | -.030        | -.263*                            | -.200          | .129             | .805**                 |                       |
|                                   | Sig. (2-tailed)         | .025                    | .050             | .       | .416    | .192       | .531           | .038             | .045                 | .631          | .810         | .017                              | .095           | .244             | .000                   |                       |
|                                   | N                       | 83                      | 69               | 83      | 69      | 83         | 69             | 69               | 74                   | 66            | 69           | 82                                | 71             | 83               | 83                     |                       |
| Study size                        | Correlation Coefficient | -.013                   | -.287*           | -.100   | 1.000   | .389**     | .231           | -.053            | .014                 | .206          | -.032        | .265*                             | -.017          | .015             | -.086                  |                       |
|                                   | Sig. (2-tailed)         | .918                    | .016             | .416    | .       | .001       | .054           | .664             | .912                 | .114          | .791         | .026                              | .900           | .903             | .483                   |                       |
|                                   | N                       | 70                      | 70               | 69      | 70      | 70         | 70             | 70               | 62                   | 60            | 70           | 70                                | 58             | 69               | 69                     |                       |
| Study duration                    | Correlation Coefficient | .206                    | -.355**          | -.145   | .389**  | 1.000      | .213           | -.146            | .210                 | .263*         | .051         | .039                              | .126           | .205             | -.012                  |                       |
|                                   | Sig. (2-tailed)         | .058                    | .003             | .192    | .001    | .          | .076           | .229             | .068                 | .032          | .676         | .727                              | .290           | .063             | .913                   |                       |
|                                   | N                       | 85                      | 70               | 83      | 70      | 85         | 70             | 70               | 76                   | 67            | 70           | 84                                | 72             | 83               | 84                     |                       |
| Placebo response                  | Correlation Coefficient | .060                    | -.474**          | .077    | .231    | .213       | 1.000          | .535**           | .159                 | -.080         | -.167        | .078                              | -.308*         | -.315**          | -.145                  |                       |
|                                   | Sig. (2-tailed)         | .621                    | .000             | .531    | .054    | .076       | .              | .000             | .216                 | .541          | .168         | .519                              | .018           | .008             | .234                   |                       |
|                                   | N                       | 70                      | 70               | 69      | 70      | 70         | 70             | 70               | 62                   | 60            | 70           | 70                                | 58             | 69               | 69                     |                       |
| Active drug response              | Correlation Coefficient | -.252*                  | .403**           | .250*   | -.053   | -.146      | .535**         | 1.000            | -.154                | -.166         | -.153        | -.081                             | -.460**        | -.291*           | .020                   |                       |
|                                   | Sig. (2-tailed)         | .035                    | .001             | .038    | .664    | .229       | .000           | .                | .231                 | .204          | .205         | .506                              | .000           | .015             | .870                   |                       |
|                                   | N                       | 70                      | 70               | 69      | 70      | 70         | 70             | 70               | 62                   | 60            | 70           | 70                                | 58             | 69               | 69                     |                       |
| Quality score                     | Correlation Coefficient | .055                    | -.299*           | -.234*  | .014    | .210       | .159           | -.154            | 1.000                | .180          | -.094        | .137                              | .367**         | .017             | -.131                  |                       |
|                                   | Sig. (2-tailed)         | .636                    | .018             | .045    | .912    | .068       | .216           | .231             | .                    | .154          | .469         | .242                              | .002           | .884             | .261                   |                       |
|                                   | N                       | 76                      | 62               | 74      | 62      | 76         | 62             | 62               | 76                   | 64            | 62           | 75                                | 70             | 74               | 75                     |                       |
| ITT analysis                      | Correlation Coefficient | .327**                  | -.172            | -.060   | .206    | .263*      | -.080          | -.166            | .180                 | 1.000         | -.043        | .089                              | .232           | .114             | -.009                  |                       |
|                                   | Sig. (2-tailed)         | .007                    | .190             | .631    | .114    | .032       | .541           | .204             | .154                 | .             | .747         | .474                              | .077           | .361             | .943                   |                       |
|                                   | N                       | 67                      | 60               | 66      | 60      | 67         | 60             | 60               | 64                   | 67            | 60           | 67                                | 59             | 66               | 66                     |                       |
| Outcome 50% or 30% pain reduction | Correlation Coefficient | .269*                   | .038             | -.030   | -.032   | .051       | -.167          | -.153            | -.094                | -.043         | 1.000        | .110                              | -.082          | -.053            | -.052                  |                       |
|                                   | Sig. (2-tailed)         | .024                    | .756             | .810    | .791    | .676       | .168           | .205             | .469                 | .747          | .            | .365                              | .543           | .663             | .670                   |                       |
|                                   | N                       | 70                      | 70               | 69      | 70      | 70         | 70             | 70               | 62                   | 60            | 70           | 70                                | 58             | 69               | 69                     |                       |
| Active placebo                    | Correlation Coefficient | -.050                   | -.192            | -.263*  | .265*   | .039       | .078           | -.081            | .137                 | .089          | .110         | 1.000                             | .288*          | -.430**          | -.376**                |                       |
|                                   | Sig. (2-tailed)         | .651                    | .111             | .017    | .026    | .727       | .519           | .506             | .242                 | .474          | .365         | .                                 | .015           | .000             | .000                   |                       |
|                                   | N                       | 84                      | 70               | 82      | 70      | 84         | 70             | 70               | 75                   | 67            | 70           | 84                                | 71             | 82               | 83                     |                       |
| Add-on treatment                  | Correlation Coefficient | .081                    | -.237            | -.200   | -.017   | .126       | -.308*         | -.460**          | .367**               | .232          | -.082        | .288*                             | 1.000          | -.061            | -.088                  |                       |
|                                   | Sig. (2-tailed)         | .497                    | .073             | .095    | .900    | .290       | .018           | .000             | .002                 | .077          | .543         | .015                              | .              | .615             | .466                   |                       |
|                                   | N                       | 72                      | 58               | 71      | 58      | 72         | 58             | 58               | 70                   | 59            | 58           | 71                                | 72             | 71               | 71                     |                       |
| Dropout during placebo            | Correlation Coefficient | -.135                   | .092             | .129    | .015    | .205       | -.315**        | -.291*           | .017                 | .114          | -.053        | -.430**                           | -.061          | 1.000            | .635**                 |                       |
|                                   | Sig. (2-tailed)         | .223                    | .453             | .244    | .903    | .063       | .008           | .015             | .884                 | .361          | .663         | .000                              | .615           | .                | .000                   |                       |
|                                   | N                       | 83                      | 69               | 83      | 69      | 83         | 69             | 69               | 74                   | 66            | 69           | 82                                | 71             | 83               | 83                     |                       |
| Dropout during active             | Correlation Coefficient | -.275*                  | .251*            | .805**  | -.086   | -.012      | -.145          | .020             | -.131                | -.009         | -.052        | -.376**                           | -.088          | .635**           | 1.000                  |                       |
|                                   | Sig. (2-tailed)         | .011                    | .037             | .000    | .483    | .913       | .234           | .870             | .261                 | .943          | .670         | .000                              | .466           | .000             | .                      |                       |
|                                   | N                       | 84                      | 69               | 83      | 69      | 84         | 69             | 69               | 75                   | 66            | 69           | 83                                | 71             | 83               | 84                     |                       |

\*\* Correlation is significant at the 0.01 level (2-tailed).

\* Correlation is significant at the 0.05 level (2-tailed).

RD=Risk difference = 1/NNT (numbers needed to treat), RC\_Harm = 1/NNH (numbers needed to harm).

Supplementary table 2. NNT for 50% or 30% pain reduction and Patient Global Impression of Change (PGIC).

|                    | NNT (50% or 30% pain reduction) | NNT (PGIC)     |
|--------------------|---------------------------------|----------------|
| Pregabalin         | 7.0 (5.9-8.7)                   | 5.4 (4.7-5.4)  |
| Capsaicin 8% patch | 12.0 (8.3-21.4)                 | 8.3 (6.3-12.2) |

While not part of our planned analysis, the fact that studies where the NNT was based on 30% or 50% pain reduction had higher NNT compared to those that used pain relief encouraged further analysis. Pain relief scales were mainly used in early studies and very few studies reported both pain relief and 30% or 50% pain reduction, but for two drug classes several studies (pregabalin (n=17) and capsaicin 8% patches (n=7)) reported both 50% or 30% pain reduction and at least much (or alternatively at least some) improvement on the PGIC. Although PGIC is a combined outcome including also adverse effects, we compared NNT for pregabalin and capsaicin 8% trials and NNT was generally lower when based on PGIC (calculated based on the ITT population) than the NNT based on 50% or 30% pain reduction.

Supplementary figure 1.

The relation between the risk difference (RD) (the inverse of NNT(numbers needed to treat) in individual studies and publication year. Line indicate a Loess fit line (50% of points of fit, Epanechnikov kernel).

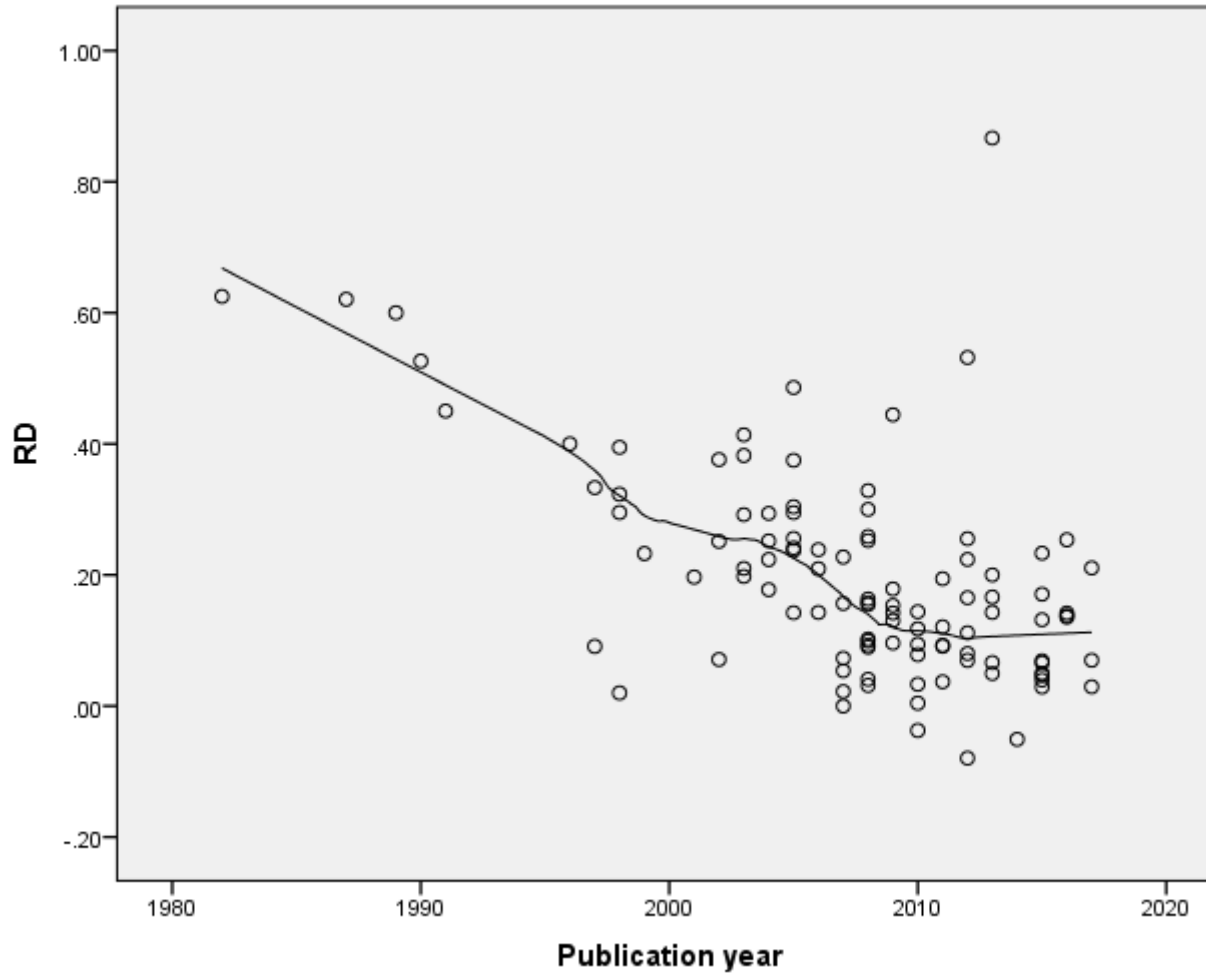

## Supplementary figure 2.

No relation between numbers needed to treat (NNT) and numbers needed to harm (NNH) and percentage of studies with add-on treatment.

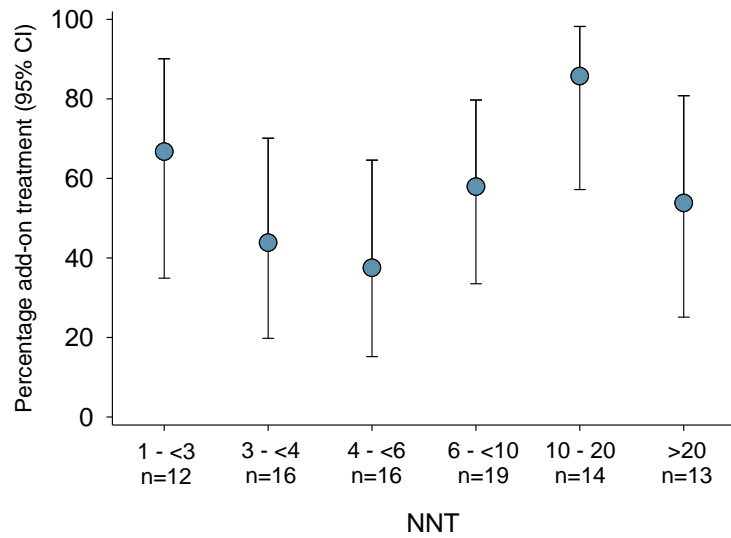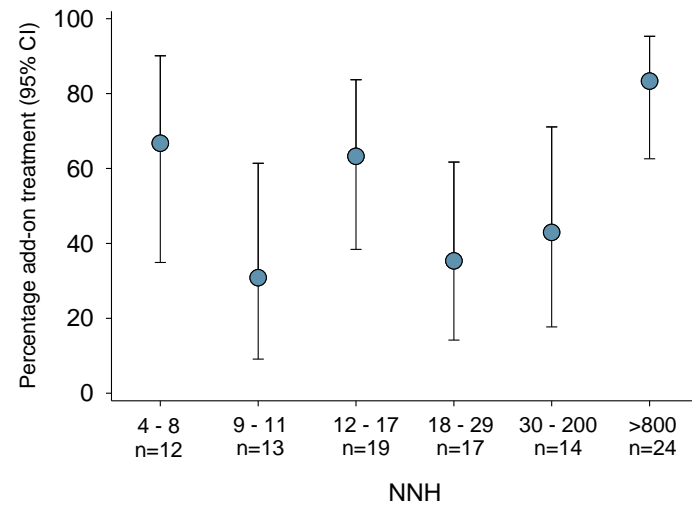

Supplementary figure 3.

Combined NNT values (fixed-effects Mantel-Haenszel method) for various drug classes in all central and peripheral neuropathic pain conditions for drug classes recommended for the treatment of neuropathic pain. For pregabalin, only trials in doses up to 600 mg were included.

The circle sizes indicate the relative number of patients who received active treatment drugs in studies for which dichotomous data were available. NNT: Numbers needed to treat. BTX-A: botulinum toxin type A; TCAs: tricyclic antidepressants; SNRIs: serotonin-noradrenaline reuptake inhibitors; Gabapentin ER: Gabapentin extended release or gabapentin enacarbil.

Publication year for unpublished studies was arbitrarily set to one year after the results were posted.

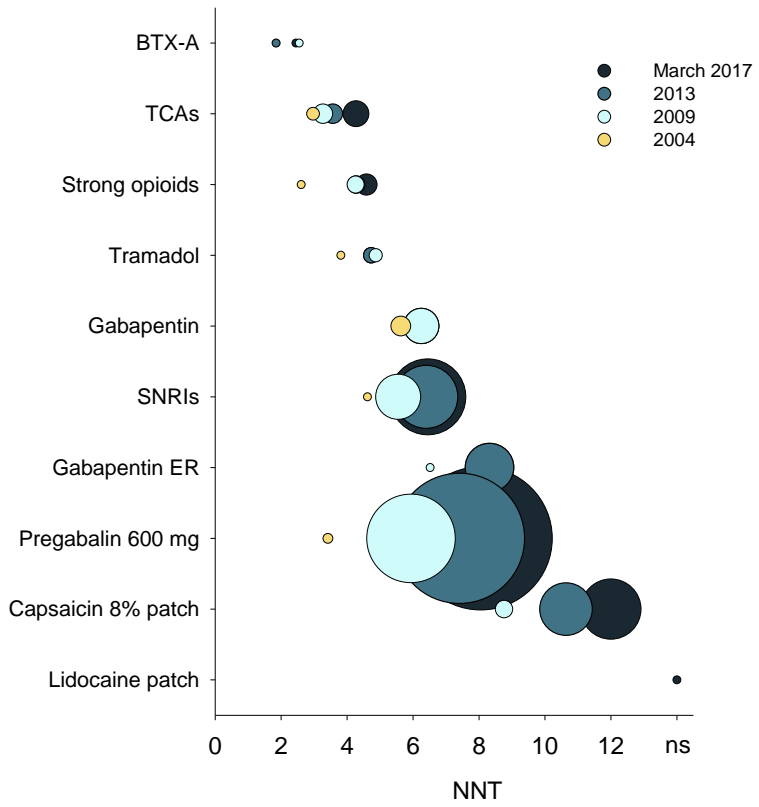

Supplementary figure 4. Publication year for each study (A) and combined percentage responding to active drug and placebo (B) based on drug class.

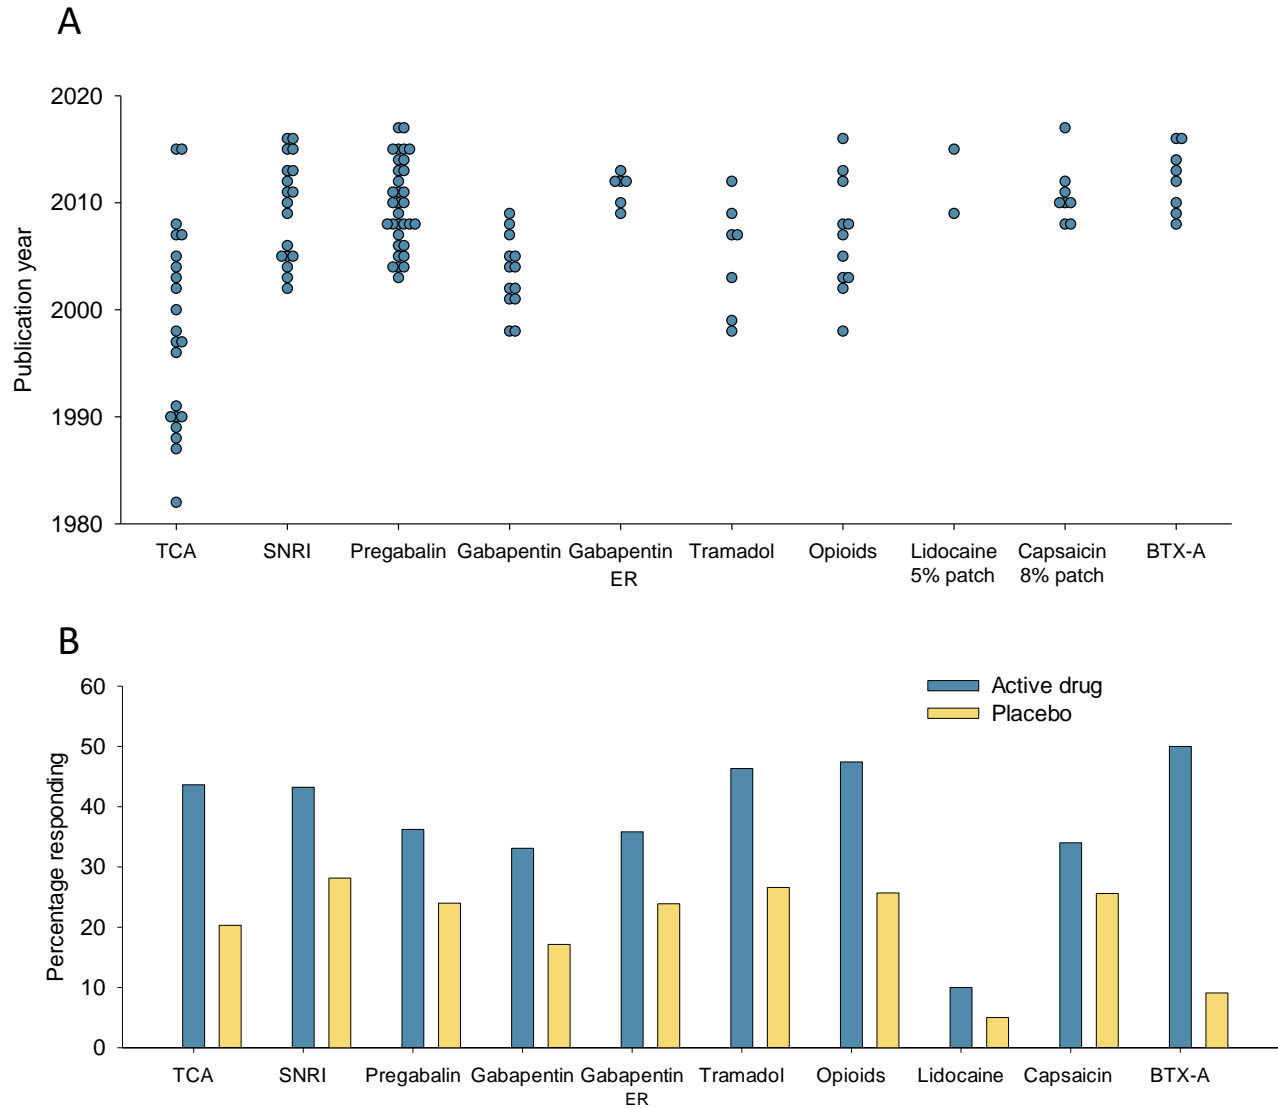

TCA=Tricyclic antidepressants, SNRIs=serotonin-noradrenaline reuptake inhibitors, BTX-A: botulinum toxin type A, Gabapentin ER: Gabapentin extended release or enacarbil

In figure A, each circle indicates one study (drug comparison to placebo).

In figure B, the y-axis indicates the combined percentage of patients responding to active drug or placebo within each drug class.

Supplementary figure 5. Cumulative NNT (random effect) of trials with tricyclic antidepressants (TCA), serotonin-noradrenaline reuptake inhibitors (SNRI), and pregabalin up to 600 mg daily.

### TCA

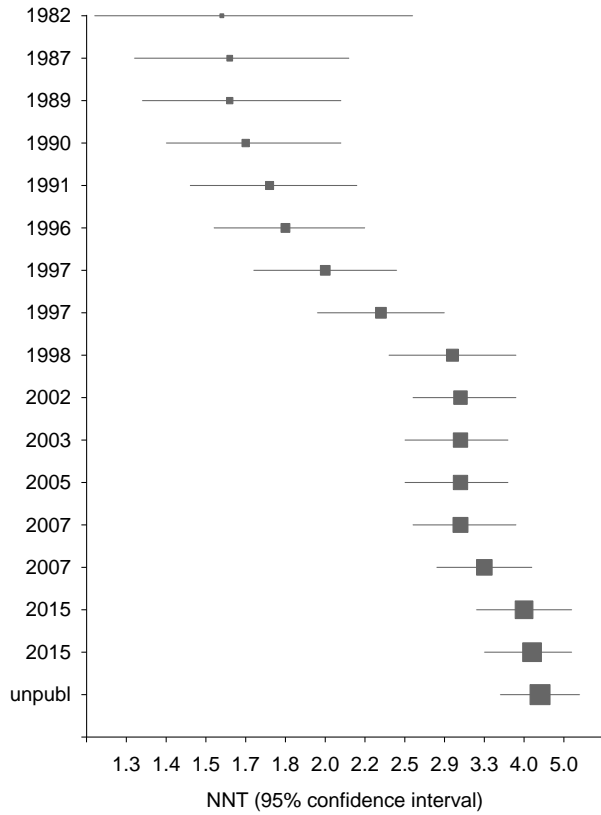

### SNRI

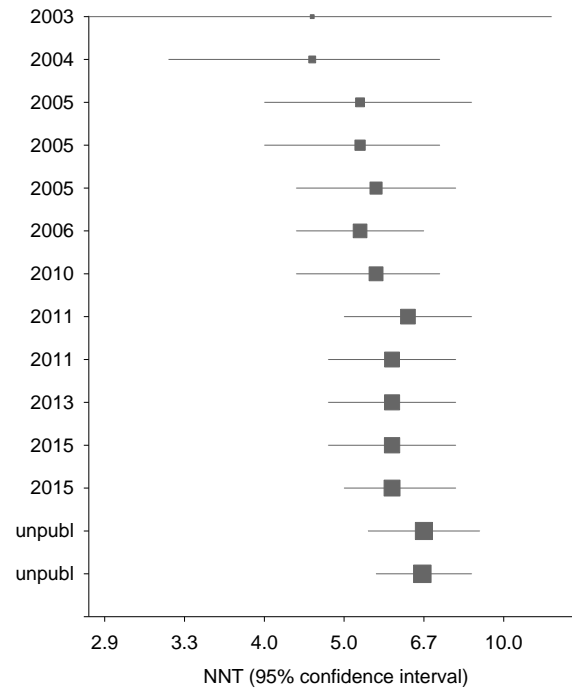

### Pregabalin 600 mg

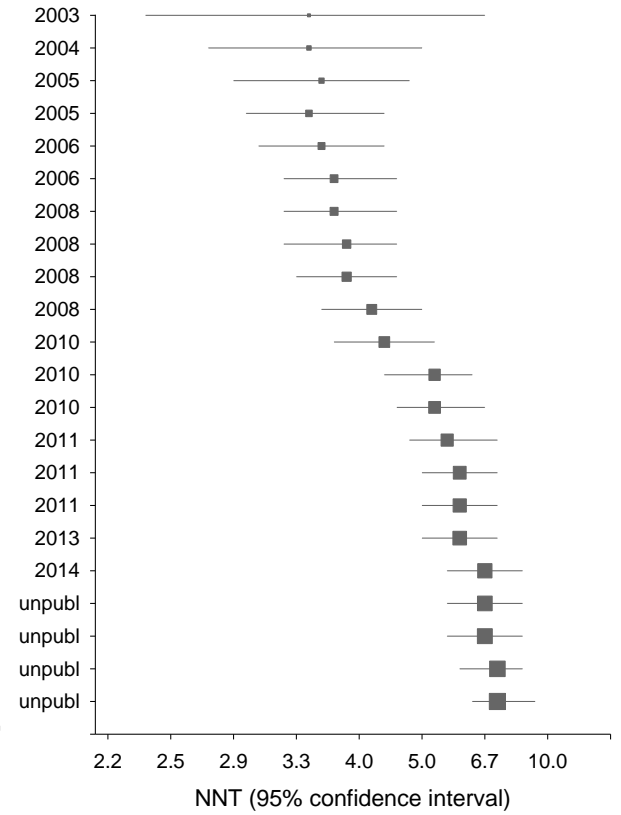



Supplementary figure 6. Publication year for each study (A), Combined NNT (B), and combined percentage responding to active drug and placebo (C) based on pain condition.

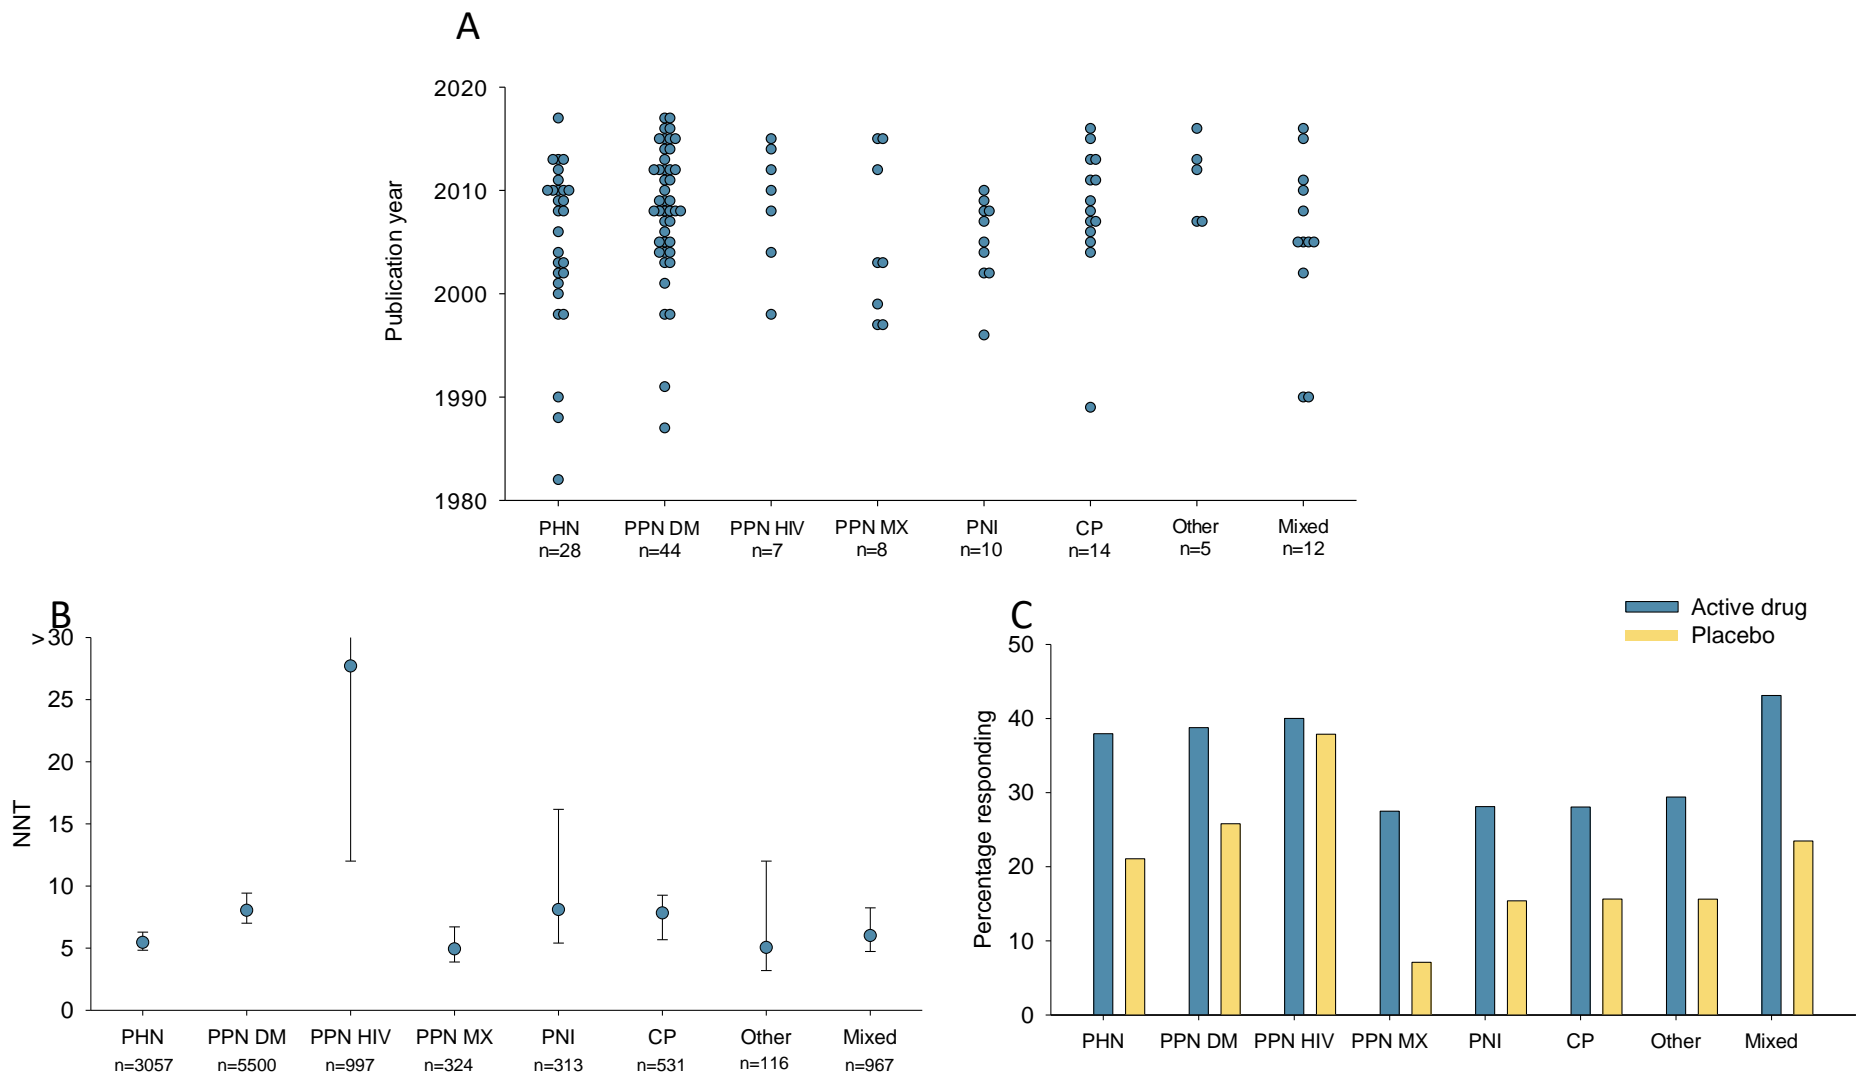

PHN=Postherpetic neuralgia, PPN=Painful polyneuropathy, DM=Diabetes mellitus, MX=Mixed, PNI=Peripheral nerve injury, CP=Central pain  
 In figure A, each circle indicates one study (drug comparison to placebo).

In figure B, the y-axis indicates the combined NNT=Numbers needed to treat (fixed-effects Mantel-Haenszel method) within each pain condition.

In figure C, the y-axis indicates the combined percentage of patients responding to active drug or placebo within each pain condition.

Supplementary figure 7. Combined NNT values (fixed-effects Mantel-Haenszel method) for various drug classes in different pain conditions. The circle sizes indicate the relative number of patients who received active treatment drugs in studies for which dichotomous data were available. In B, only studies with pregabalin up to 600 mg per day are included.

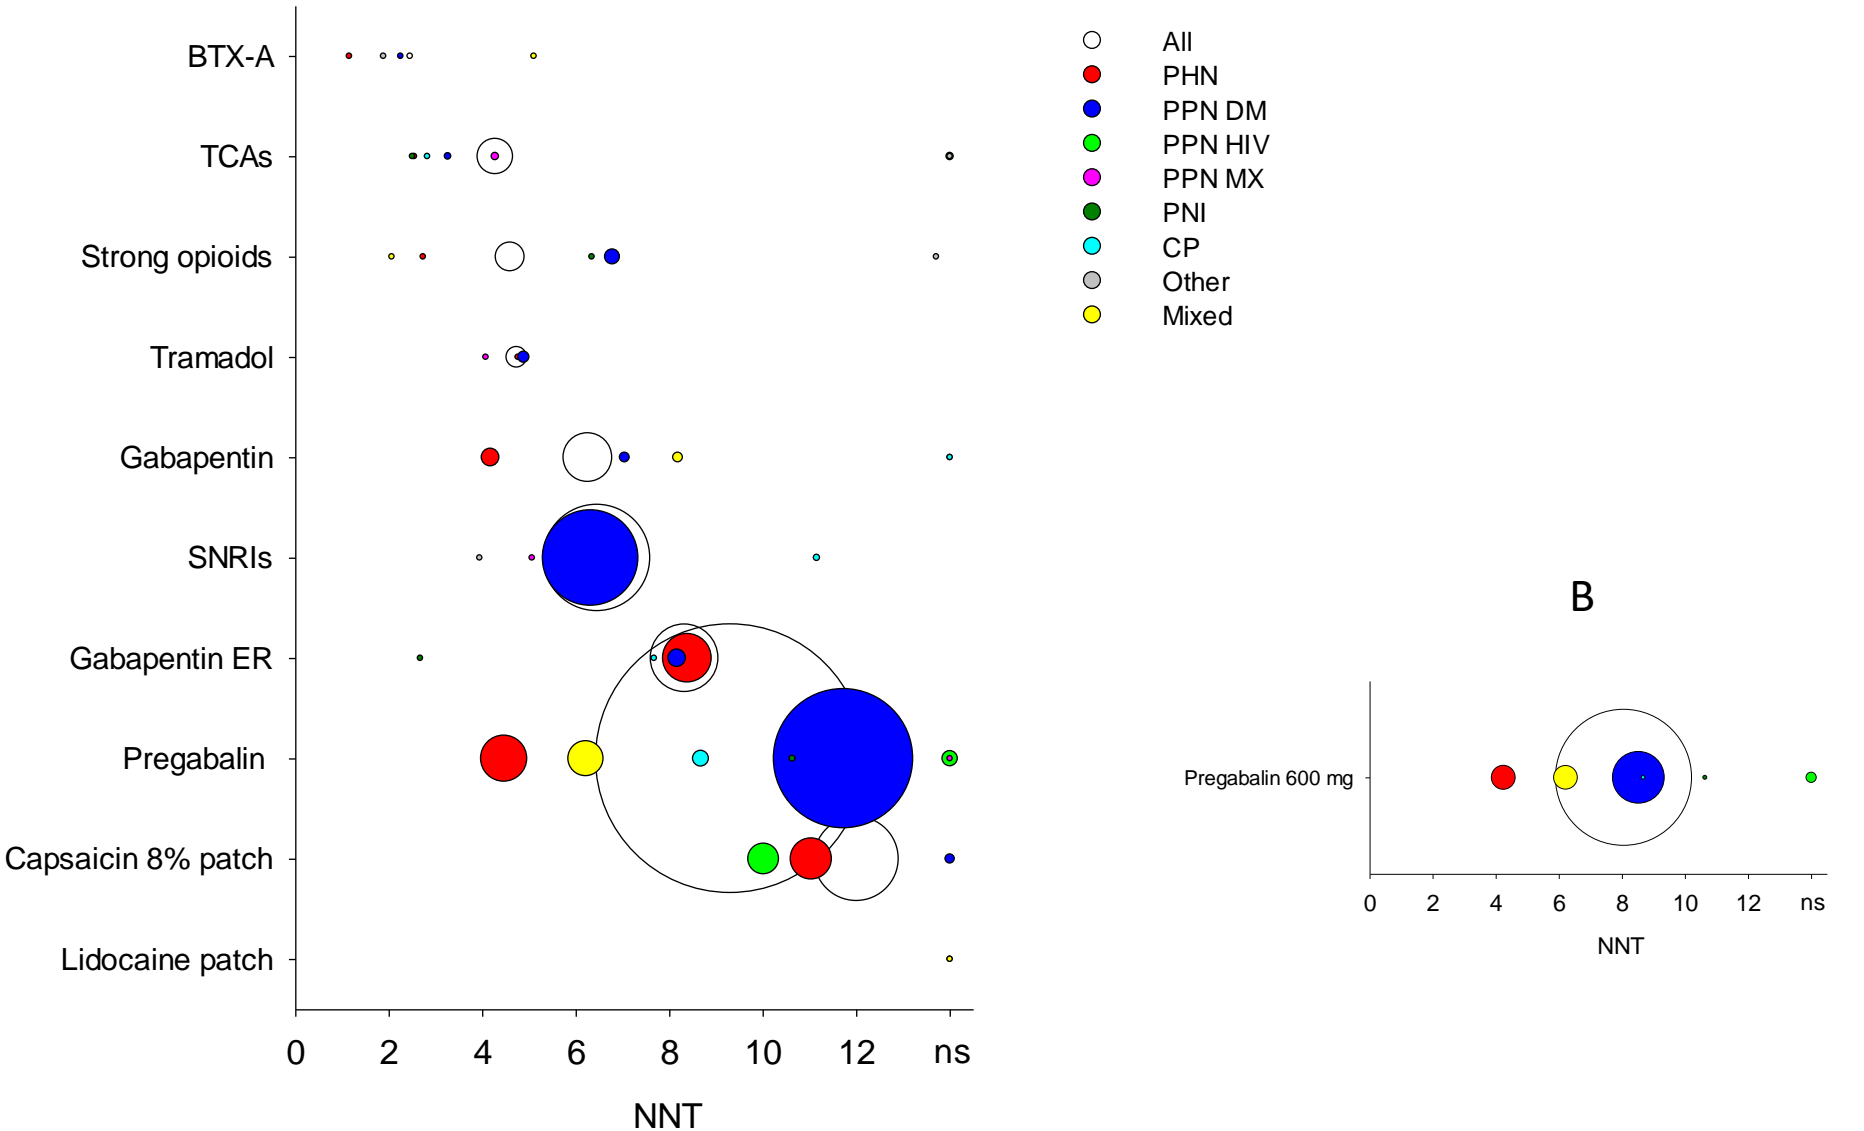

NNT: Numbers needed to treat. BTX-A: botulinum toxin type A; TCAs: tricyclic antidepressants; SNRIs: serotonin-noradrenaline reuptake inhibitors; Gabapentin ER: Gabapentin extended release or gabapentin enacarbil. PHN=Postherpetic neuralgia, PPN=Painful polyneuropathy, DM=Diabetes mellitus, MX=Mixed, PNI=Peripheral nerve injury, CP=Central pain

## References for additional 20 comparisons

1. Attal N, de Andrade DC, Adam F, Ranoux D, Teixeira MJ, Galhardoni R, et al. Safety and efficacy of repeated injections of botulinum toxin A in peripheral neuropathic pain (BOTNEP): a randomised, double-blind, placebo-controlled trial. *Lancet Neurol* 2016;15:555-65.
2. Brown TR, Slee A. A randomized placebo-controlled trial of duloxetine for central pain in multiple sclerosis. *Int J MS Care* 2015;17:83-9.
3. Chappell AS, Iyengar S, Lobo ED, Prucka WR. Results from clinical trials of a selective ionotropic glutamate receptor 5 (iGluR5) antagonist, LY5454694 tosylate, in 2 chronic pain conditions. *Pain* 2014;155:1140-9.
4. Demant DT, Lund K, Finnerup NB, Vollert J, Maier C, Segerdahl MS, et al. Pain relief with lidocaine 5% patch in localized peripheral neuropathic pain in relation to pain phenotype: a randomised, double-blind, and placebo-controlled, phenotype panel study. *Pain* 2015;156:2234-44.
5. Dinat N, Marinda E, Moch S, Rice AS, Kamerman PR. Randomized, Double-Blind, Crossover Trial of Amitriptyline for Analgesia in Painful HIV-Associated Sensory Neuropathy. *PLoS One* 2015;10:e0126297.
6. Gao Y, Guo X, Han P, Li Q, Yang G, Qu S, et al. Treatment of patients with diabetic peripheral neuropathic pain in China: a double-blind randomised trial of duloxetine vs. placebo. *Int J Clin Pract* 2015;69:957-66.
7. Ghasemi M, Ansari M, Basiri K, Shaigannejad V. The effects of intradermal botulinum toxin type a injections on pain symptoms of patients with diabetic neuropathy. *J Res Med Sci* 2014;19:106-11.
8. Han ZA, Song DH, Oh HM, Chung ME. Botulinum toxin type A for neuropathic pain in patients with spinal cord injury. *Ann Neurol* 2016;79:569-78.
- 9+10. Holbech JV, Bach FW, Finnerup NB, Brosen K, Jensen TS, Sindrup SH. Imipramine and pregabalin combination for painful polyneuropathy: a randomized controlled trial. *Pain*. 2015;156:958-66.
11. Huffman C, Stacey BR, Tuchman M, Burbridge C, Li C, Parsons B, et al. Efficacy and Safety of Pregabalin in the Treatment of Patients With Painful Diabetic Peripheral Neuropathy and Pain on Walking. *Clin J Pain* 2015;31:946-58.
12. Liu Q, Chen H, Xi L, Hong Z, He L, Fu Y, et al. A Randomized, Double-blind, Placebo-controlled Trial to Evaluate the Efficacy and Safety of Pregabalin for Postherpetic Neuralgia in a Population of Chinese Patients. *Pain Pract* 2017;17:62-9.
13. Mu Y, Liu X, Li Q, Chen K, Liu Y, Lv X, et al. Efficacy and safety of pregabalin for painful diabetic peripheral neuropathy in a population of Chinese patients: A randomized placebo-controlled trial. *J Diabetes* 2018;10(3):256-65 (also: [Clinicaltrials.gov NCT01332149](https://clinicaltrials.gov/ct2/show/study/NCT01332149)).
14. Raskin P, Huffman C, Yurkewicz L, Pauer L, Scavone JM, Yang R, et al. Pregabalin in Patients With Painful Diabetic Peripheral Neuropathy Using an NSAID for Other Pain Conditions: A Double-Blind Crossover Study. *Clin J Pain* 2016;32:203-10.
15. Schukro RP, Oehmke MJ, Geroldinger A, Heinze G, Kress HG, Pramhas S. Efficacy of Duloxetine in Chronic Low Back Pain with a Neuropathic Component: A Randomized, Double-blind, Placebo-controlled Crossover Trial. *Anesthesiology* 2016;124:150-8.
16. Simpson DM, Rice AS, Emir B, Landen J, Semel D, Chew ML, et al. A randomized, double-blind, placebo-controlled trial and open-label extension study to evaluate the efficacy and safety of pregabalin in the treatment of neuropathic pain associated with human immunodeficiency virus neuropathy. *Pain* 2014;155:1943-54.
17. Simpson RW, Włodarczyk JH. Transdermal Buprenorphine Relieves Neuropathic Pain: A Randomized, Double-Blind, Parallel-Group, Placebo-Controlled Trial in Diabetic Peripheral Neuropathic Pain. *Diabetes Care* 2016;39:1493-500.
18. Simpson DM, Robinson-Papp J, Van J, Stoker M, Jacobs H, Snijder RJ, et al. Capsaicin 8% Patch in Painful Diabetic Peripheral Neuropathy: A Randomized, Double-Blind, Placebo-Controlled Study. *J Pain* 2017;18:42-53.
19. Ziegler D, Duan WR, An G, Thomas JW, Nothaft W. A randomized double-blind, placebo-, and active-controlled study of T-type calcium channel blocker ABT-639 in patients with diabetic peripheral neuropathic pain. *Pain* 2015;156:2013-20.
20. [Clinicaltrials.gov NCT00603265](https://clinicaltrials.gov/ct2/show/study/NCT00603265). Safety and Efficacy Study of ADL5859 in Participants With Neuropathic Pain Associated With Diabetic Peripheral Neuropathy
